# Supplementary material
Source: PubMed Central journal article supplement (PMC7007818)
Supplement: NIHMS1060774-supplement-supplementary_data.pdf [file NIHMS1060774-supplement-supplementary_data.pdf]

**Supplementary Figure S1:** Summary of gene expression changes following sulforaphane (SFN) treatment in breast cancer cells. **A**, Relative gene expression in SFN-treated cells in comparison with control. Arrows indicate common down-regulated genes in all three cell lines. **B**, Quantitative reverse transcription-polymerase chain reaction (qRT-PCR) for *collagen, type I, alpha 1 (COL1A1)*, *cathepsin K (CTSK)*, *tumor necrosis factor (TNF)*, and *matrix metalloproteinase (MMP9)* gene expression in control and SFN-treated cells (24-hour treatment). Results shown are mean  $\pm$  SD (n=3). Statistical significance of difference was analyzed by ANOVA followed by Dunnett's test. Consistent results were obtained from two independent experiments.

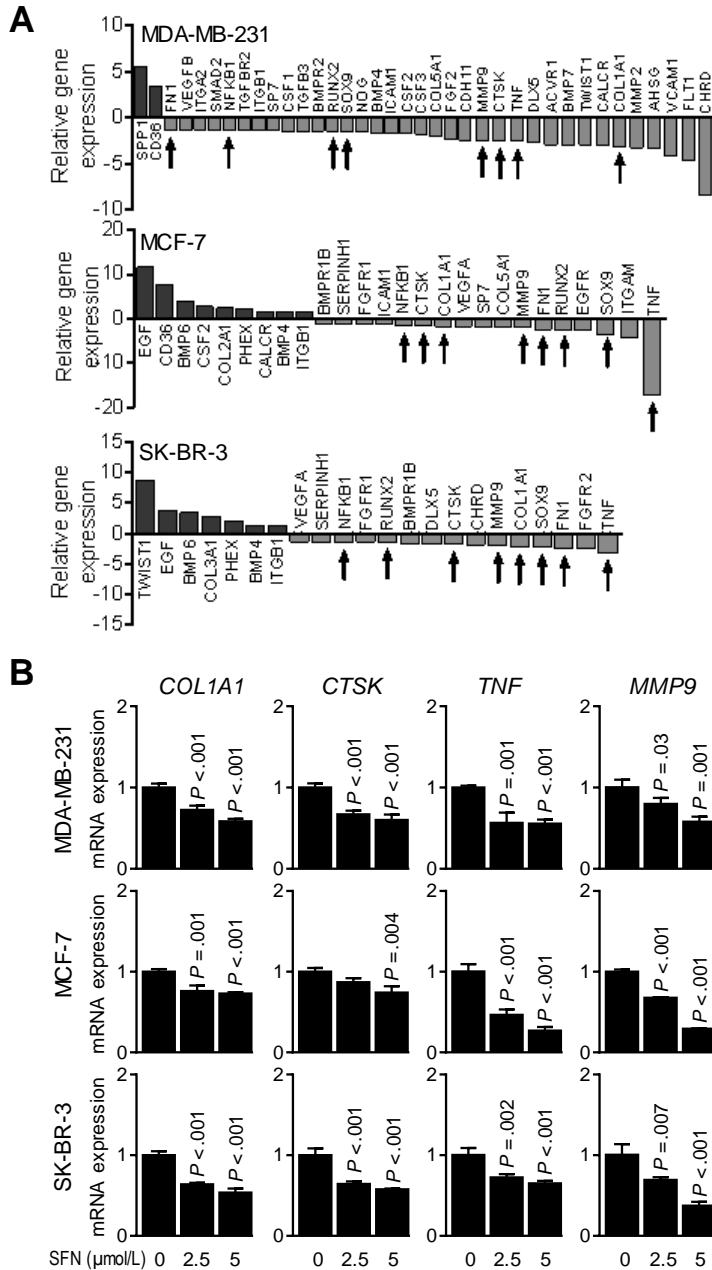

**Supplementary Figure S2:** Sulforaphane (SFN) treatment downregulated expression of Runt-related transcription factor 2 (RUNX2) in SK-BR-3 cell line. **A**, Representative confocal microscopic images ( $\times 60$  objective magnification in oil) of RUNX2 protein (green) in SK-BR-3 cells after 24 hours of treatment with dimethyl sulfoxide (DMSO) or 5  $\mu\text{mol/L}$  SFN. Nuclei were stained with 4',6-diamidino-2-phenylindole (blue). **B**, Quantitation of RUNX2 protein level intensity in SK-BR-3 cells. Results shown are mean RUNX2 intensity  $\pm$  SD ( $n=3$ ). Statistical significance of difference was analyzed by two-sided Student's t-test. **C**, Quantitative real-time PCR analysis of *RUNX2* mRNA expression in SK-BR-3 cells treated with DMSO or the indicated doses of SFN for specified time points. Results shown are mean  $\pm$  SD ( $n=3$ ). Statistical significance of difference was analyzed by one-way analysis of variance (ANOVA) followed by Dunnett's test. Consistent results were obtained from repeated experiments.

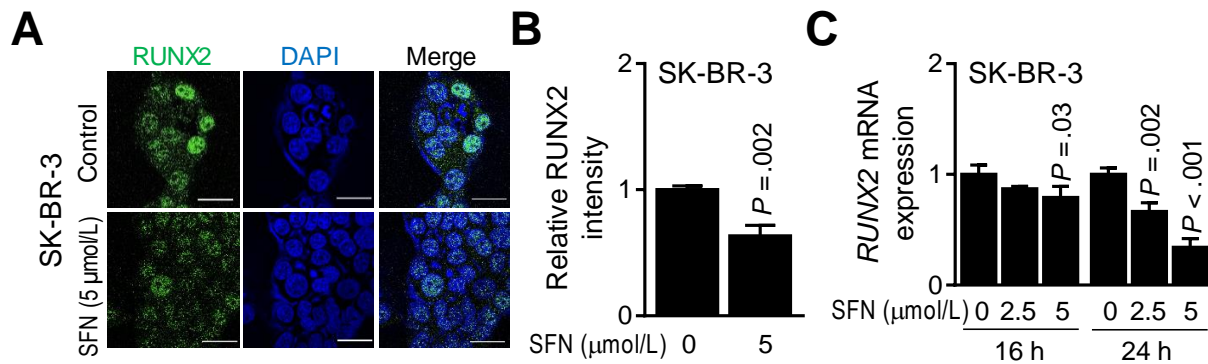

**Supplementary Figure S3:** Expression of runt-related transcription factor 2 (RUNX2) protein was higher in luminal-type breast cancers than in normal mammary tissues. **A**, Immunohistochemical images for RUNX2 protein (scale bar = 100  $\mu\text{m}$ ; 20 $\times$  objective magnification) in a representative normal mammary tissue and in a luminal-type breast cancer tissue. **B**, Quantitation (H-score) of RUNX2 protein level in normal mammary tissues (n = 60) and luminal-type breast cancer tissues (n = 147). Results shown are mean  $\pm$  SD. Statistical significance was determined by two-sided Student's t-test.

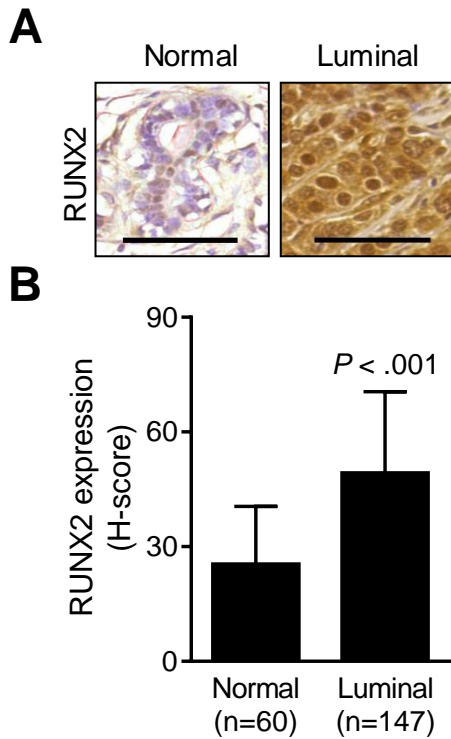

**Supplementary Figure S4:** Runt-related transcription factor 2 (RUNX2) was recruited at the promoter of *matrix metalloproteinase 9 (MMP9)* **A**, Putative RUNX2 binding sequence sites in the promoter region of *collagen, type I, alpha 1 (COL1A1)*, *tumor necrosis factor  $\alpha$  (TNF $\alpha$ )*, and *matrix metalloproteinase (MMP9)*. The primers were as follows: *COL1A1*- Forward 5'-ATTGGAGGTCCCAGGAAGAG-3' Reverse 5'-TTGGGAGTTGGAATGGAGAG; *MMP9*- Primer for: -488 TGTGGG -483 Forward 5'-AGGCTGCTACTGTCCCCTTT-3' Reverse 5'-TCTGAAAGCCTCCAGTGGTC-3'; Primer for -51 GTGGG -47 Forward 5'-GAGTCAGCACTTGCCTGTCA-3' Reverse 5'-AAGAGCACAAGGGTGGACTG-3'; and *TNF $\alpha$* - Forward 5'-GACAGATGTGGGGTGTGAGA-3' Reverse 5'-ACCTTCCAGGCATTCAACAG-3'. **B**, Chromatin immunoprecipitation assay using MDA-MB-231 cells showing the binding of RUNX2 transcription factor to the *MMP9*. Results shown are the mean  $\pm$  SD (n = 2-3). Statistical significance of difference was analyzed by Bonferroni's multiple comparisons test.

Supplementary Figure S4

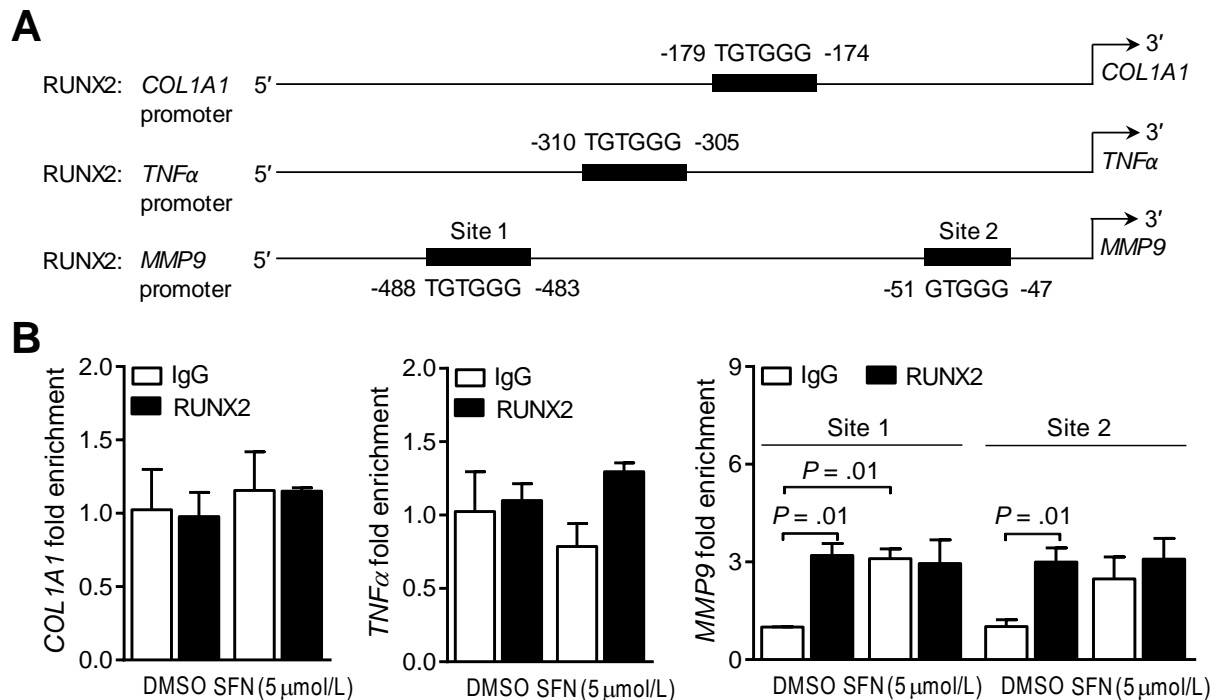

### Supplementary Table S1

Correlation between genes altered by SFN treatment (TCGA BrCa dataset, n = 1097).

The ns signifies not significant.

| <b>Gene</b>  | <b>Gene</b>   | <b>Pearson r</b> | <b>P</b> |
|--------------|---------------|------------------|----------|
| <i>RUNX2</i> | <i>NFKB1</i>  | .22              | <.001    |
| <i>RUNX2</i> | <i>SOX9</i>   | .059             | .05      |
| <i>RUNX2</i> | <i>CTSK</i>   | .69              | <.001    |
| <i>RUNX2</i> | <i>COL1A1</i> | .68              | <.001    |
| <i>RUNX2</i> | <i>TNF</i>    | .11              | .004     |
| <i>RUNX2</i> | <i>MMP9</i>   | .24              | <.001    |
| <i>NFKB1</i> | <i>SOX9</i>   | .08              | .01      |
| <i>NFKB1</i> | <i>CTSK</i>   | .18              | <.001    |
| <i>NFKB1</i> | <i>COL1A1</i> | .11              | <.001    |
| <i>NFKB1</i> | <i>TNF</i>    | .16              | <.001    |
| <i>NFKB1</i> | <i>MMP9</i>   | .03              | ns       |

## Supplementary Table S2

Consensus binding sequences for transcription factors

| Transcription factor | Target gene                   | No. of sites | Position                                                                                                                                 |
|----------------------|-------------------------------|--------------|------------------------------------------------------------------------------------------------------------------------------------------|
| RUNX2                | <i>NFKB1</i>                  | 3            | -1161 <i>TGTGGG</i> -1152; -901 <i>TGTGGG</i> -896; -793 <i>GTGGG</i> -789                                                               |
| RUNX2                | <i>RELA</i>                   | 4            | -988 <i>AGTGGG</i> -983; -712 <i>TGTGGG</i> -707; -640 <i>GTGGG</i> -635; -322 <i>GTGGG</i> -318                                         |
| RUNX2                | <i>COL1A1</i>                 | 1            | -179 <i>TGTGGG</i> -174                                                                                                                  |
| RUNX2                | <i>MMP9</i>                   | 2            | -488 <i>TGTGGG</i> -483; -51 <i>GTGGG</i> -47                                                                                            |
| RUNX2                | <i>TNF</i>                    | 1            | -310 <i>TGTGGG</i> -305                                                                                                                  |
| RUNX2                | <i>SOX9, CTSK</i>             | 0            | No match                                                                                                                                 |
| NFKB1                | <i>RELA</i>                   | 5            | -1054 <i>TCCCC</i> -1050; -798 <i>GGGGAT</i> -793; -780 <i>GGGGGTxxxxxxxCCCC</i> -764; -729 <i>GGGGGA</i> -724; -350 <i>ATTCCCC</i> -344 |
| NFKB1                | <i>COL1A1</i>                 | 5            | -902 <i>GGGGGAT</i> -896; -886 <i>GGGGAT</i> -881; -848 <i>GAATCCCC</i> -841; -588 <i>GTTCCCC</i> -582; -416 <i>GGAGGACCCCC</i> -406     |
| NFKB1                | <i>MMP9</i>                   | 2            | -619 <i>GGGGGTTGCCCC</i> -608; -332 <i>GGGGGATCCC</i> -323                                                                               |
| NFKB1                | <i>RUNX2, SOX9, CTSK, TNF</i> | 0            | No match                                                                                                                                 |

Consensus binding sequences according to JASPAR (<http://jaspar.genereg.net/>) browser:

RUNX2: **TGTGGTTT**; NF- $\kappa$ B1: **GGGGATTCCCC**
